# Supplementary material for: ﻿A consolidated phylogeny of snail-eating snakes (Serpentes, Dipsadini), with the description of five new species from Colombia, Ecuador, and Panama
Source: Zookeys. 2023 Jan 25;1143:1–49. doi: 10.3897/zookeys.1143.93601 (PMC10208808; doi:10.3897/zookeys.1143.93601)
Supplement: Supplementary material 2 — Locality data used to create distribution maps. Type localities indicated in bold type. [file zookeys-1143-001_article-93601__-s002.xls]

## Sheet: Locality records
Species	Country	Province	Locality	Latitude	Longitude	Elev. (m)	Source
Dipsas vermiculata	Colombia	Caquetá	Parque Nacional Natural Alto Fragua Indi-Wasi	1.5772	-75.9472	1100	MHNUC 0697; Vera-Perez 2020
Dipsas vermiculata	Colombia	Putumayo	Reserva Natural La Isla Escondida	0.654207	-77.0738	861	iNaturalist
Dipsas vermiculata	Ecuador	Morona Santiago	Chiguaza	-2.03989	-77.9855	1013	Harvey 2008
Dipsas vermiculata	Ecuador	Morona Santiago	Refugio de Vida Silvestre Marantian	-2.15204	-77.6706	594	QCAZ 17367; Supplementary file 1
Dipsas vermiculata	Ecuador	Morona Santiago	Turula	-2.18146	-78.0823	1184	Peters 1960
Dipsas vermiculata	Ecuador	Napo	14.7 km (by road) NE of Rio Salado	-0.132937	-77.6129	1380	Harvey 2008
Dipsas vermiculata	Ecuador	Napo	Narupa Biological Reserve	-0.68226	-77.7395	1163	ZSFQ 5061, 5064; Supplementary file 1
Dipsas vermiculata	Ecuador	Napo	Reserva Biológica Colonso Chalupas	-0.9447	-77.8939	730	DHMECN 15798
Dipsas vermiculata	Ecuador	Napo	Río Salado	-0.193358	-77.6978	1678	USNM 286337
Dipsas vermiculata	Ecuador	Orellana	Cabeceras del Río Napo	-1.06199	-78.0035	1080	Harvey 2008
Dipsas vermiculata	Ecuador	Orellana	Reserva Biológica Río Bigal	-0.532653	-77.4492	1050	Photo by Thierry García
Dipsas vermiculata	Ecuador	Pastaza	Chichirota (type locality)	-2.36109	-76.6625	256	Peters 1960
Dipsas vermiculata	Ecuador	Pastaza	Kallana	-1.46963	-77.2784	328	MZUTI 5080; Supplementary file 1
Dipsas vermiculata	Ecuador	Pastaza	Puyo	-1.46678	-77.9834	953	Harvey 2008
Dipsas vermiculata	Ecuador	Pastaza	Puyo, 1 km W of	-1.49583	-78.027	1000	MCZ FS-F27303
Dipsas vermiculata	Ecuador	Pastaza	Río Anzu Ecological Reserve	-1.40648	-78.0483	1144	MECN et al. 2013
Dipsas vermiculata	Ecuador	Pastaza	Río Shilcayacu	-1.46667	-77.9833	954	Harvey 2008
Dipsas vermiculata	Ecuador	Pastaza	Tamandúa Reserve	-1.30688	-77.9499	1079	ZSFQ 5059; Supplementary file 1
Dipsas vermiculata	Ecuador	Pastaza	Tzarentza	-1.35696	-78.0581	1355	MZUTI 4738, QCAZ 13563, 13566; Supplementary file 1
Dipsas vermiculata	Ecuador	Sucumbíos	El Reventador	-0.0448	-77.5286	1476	MHNG 2436.014; Supplementary file 1
Dipsas welborni sp. nov.	Ecuador	Morona Santiago	Cascadas Coloradas	-2.95133	-78.3519	1400	UTA R-55939; Sheehy 2012
Dipsas welborni sp. nov.	Ecuador	Morona Santiago	Comunidad Shuar Kukunk	-3.32432	-78.2167	1061	QCAZ 16084, 16088; Supplementary file 1
Dipsas welborni sp. nov.	Ecuador	Morona Santiago	Cordillera de Cutucú	-2.77419	-78.1577	1358	QCAZ 16201; Torres-Carvajal et al. 2019
Dipsas welborni sp. nov.	Ecuador	Morona Santiago	El Zarza, zona de amortiguamiento	-3.78432	-78.4959	1466	QCAZ 15975; Supplementary file 1
Dipsas welborni sp. nov.	Ecuador	Morona Santiago	Limón, 6.6 km N of	-2.92665	-78.407	1099	QCAZ 7452; Supplementary file 1
Dipsas welborni sp. nov.	Ecuador	Morona Santiago	Reserva Biológica El Quimi	-3.44619	-78.4076	1760	iNaturalist
Dipsas welborni sp. nov.	Ecuador	Morona Santiago	Valle del Río Quimi	-3.50994	-78.4304	1050	Betancourt et al. 2018
Dipsas welborni sp. nov.	Ecuador	Morona Santiago	Warintza	-3.16514	-78.2615	853	QCAZ 17664; Torres-Carvajal et al. 2019
Dipsas welborni sp. nov.	Ecuador	Zamora Chinchipe	Alrededores de Ciudad Perdida	-4.46515	-78.8257	1210	QCAZ 15736; Torres-Carvajal et al. 2019
Dipsas welborni sp. nov.	Ecuador	Zamora Chinchipe	Alto Machinaza	-3.77625	-78.5663	1347	Almendáriz et al. 2014
Dipsas welborni sp. nov.	Ecuador	Zamora Chinchipe	Bombuscaro	-4.11201	-78.9726	1543	QCAZ 13826; Supplementary file 1
Dipsas welborni sp. nov.	Ecuador	Zamora Chinchipe	Campamento Fruta del Norte	-3.78683	-78.4947	1434	Almendáriz et al. 2014
Dipsas welborni sp. nov.	Ecuador	Zamora Chinchipe	Concesión ECSA	-3.57524	-78.4361	1211	DHMECN 11197; Arteaga et al. 2018
Dipsas welborni sp. nov.	Ecuador	Zamora Chinchipe	Cordillera del Cóndor	-4.25026	-78.6175	1271	QCAZ 7401; Torres-Carvajal et al. 2019
Dipsas welborni sp. nov.	Ecuador	Zamora Chinchipe	Miazi	-4.29827	-78.6421	1012	Photo by NCI park ranger
Dipsas welborni sp. nov.	Ecuador	Zamora Chinchipe	Nangaritza	-4.43169	-78.6387	996	MZUA.RE.0261; Arteaga et al. 2018
Dipsas welborni sp. nov.	Ecuador	Zamora Chinchipe	Podocarpus	-4.13445	-78.9939	1443	Photo by Darwin Núñez
Dipsas welborni sp. nov.	Ecuador	Zamora Chinchipe	Reserva Maycu	-4.20719	-78.6399	960	MZUTI 3663; Supplementary file 1
Dipsas welborni sp. nov.	Ecuador	Zamora Chinchipe	Río Quimi	-3.56064	-78.4599	853	iNaturalist
Dipsas welborni sp. nov.	Ecuador	Zamora Chinchipe	Sendero Higuerones	-4.11464	-78.967	981	QCAZ 13825; Supplementary file 1
Dipsas welborni sp. nov.	Ecuador	Zamora Chinchipe	Sendero junto al Río Nangaritza	-4.44321	-78.7906	1118	Arteaga et al. 2018
Dipsas welborni sp. nov.	Ecuador	Zamora Chinchipe	Shaime	-4.341	-78.68	907	QCAZ 3723; Torres-Carvajal et al. 2019
Dipsas welborni sp. nov.	Ecuador	Zamora Chinchipe	Tepuy Las Orquídeas	-4.2632	-78.6911	1843	QCAZ 9173; Torres-Carvajal et al. 2019
Dipsas welborni sp. nov.	Ecuador	Zamora Chinchipe	Vía a Nuevo Paraíso (type locality)	-4.26395	-78.6448	1078	ZSFQ 5060; Supplementary file 1
Dipsas welborni sp. nov.	Ecuador	Zamora Chinchipe	Vía Miazi–Nuevo Paraiso	-4.30916	-78.645	1006	QCAZ 15423; Torres-Carvajal et al. 2019
Dipsas welborni sp. nov.	Peru	Amazonas	Alto Río Santiago	-3.47208	-78.0173	1200	Vera-Pérez 2020
Dipsas welborni sp. nov.	Peru	Amazonas	Etseketai Entse	-4.45372	-78.1694	245	Vera-Pérez 2020
Sibon annulatus	Costa Rica	Alajuela	Arenal Lodge	10.4388	-84.7082	714	iNaturalist
Sibon annulatus	Costa Rica	Alajuela	Cariblanco	10.2732	-84.1824	854	Savage and McDiarmid 1992
Sibon annulatus	Costa Rica	Alajuela	Colonia Palmareña	10.25	-84.5667	641	Solórzano 2001
Sibon annulatus	Costa Rica	Alajuela	Isla Bonita	10.2436	-84.1692	1106	Peters 1960
Sibon annulatus	Costa Rica	Alajuela	La Balsa	10.1734	-84.4986	1090	Savage and McDiarmid 1992
Sibon annulatus	Costa Rica	Alajuela	La Marina, 0.5 km SW of	10.3731	-84.38	500	Savage and McDiarmid 1992
Sibon annulatus	Costa Rica	Alajuela	Lago Arenal	10.4808	-84.7647	618	iNaturalist
Sibon annulatus	Costa Rica	Alajuela	Laguna Monte Alegre	10.2959	-84.2031	865	KU 63890; VertNet
Sibon annulatus	Costa Rica	Alajuela	Pocosol	10.3857	-84.621	541	iNaturalist
Sibon annulatus	Costa Rica	Alajuela	Pueblo Viejo	10.3372	-84.2869	621	Solórzano 2001
Sibon annulatus	Costa Rica	Alajuela	Reserva Biológica Alberto Manuel	10.2288	-84.6395	940	iNaturalist
Sibon annulatus	Costa Rica	Alajuela	San Ramón	10.087	-84.47	1049	iNaturalist
Sibon annulatus	Costa Rica	Alajuela	Tapir Valley	10.7209	-85.0137	681	iNaturalist
Sibon annulatus	Costa Rica	Alajuela	Villa Blanca Cloud Forest Reserve	10.2037	-84.487	1088	iNaturalist
Sibon annulatus	Costa Rica	Cartago	Buenavista	9.9201	-83.6109	780	Solórzano 2001
Sibon annulatus	Costa Rica	Cartago	Cachí	9.82563	-83.8022	1185	Solórzano 2001
Sibon annulatus	Costa Rica	Cartago	Cartago (type locality)	9.85931	-83.8673	1400	Günther 1872
Sibon annulatus	Costa Rica	Cartago	Chitaría, 1.5 km SW of	9.9277	-83.6014	720	Savage and McDiarmid 1992
Sibon annulatus	Costa Rica	Cartago	El Silencio	9.87206	-83.6109	946	Savage and McDiarmid 1992
Sibon annulatus	Costa Rica	Cartago	Moravía	9.8288	-83.4418	1105	Savage and McDiarmid 1992
Sibon annulatus	Costa Rica	Cartago	Peralta	9.96796	-83.6122	360	Peters 1960
Sibon annulatus	Costa Rica	Cartago	Wildlife Refuge La Marta	9.78607	-83.691	755	iNaturalist
Sibon annulatus	Costa Rica	Guanacaste	San Gerardo Biological Station	10.3651	-84.791	1262	iNaturalist
Sibon annulatus	Costa Rica	Guanacaste	Santa Cecilia	11.0606	-85.413	336	Solórzano 2001
Sibon annulatus	Costa Rica	Heredia	El Roble	10.4223	-84.0983	124	iNaturalist
Sibon annulatus	Costa Rica	Heredia	La Selva Biological Station	10.4306	-84.007	77	iNaturalist
Sibon annulatus	Costa Rica	Heredia	Rara Avis Reserve	10.2878	-84.0396	620	iNaturalist
Sibon annulatus	Costa Rica	Heredia	Río Frío	10.2754	-83.8824	155	Savage and McDiarmid 1992
Sibon annulatus	Costa Rica	Heredia	Yatama Ecolodge	10.3458	-84.0274	243	iNaturalist
Sibon annulatus	Costa Rica	Limón	Braulio Carrillo Rainforest	10.1722	-83.9141	545	iNaturalist
Sibon annulatus	Costa Rica	Limón	Cahuita	9.72193	-82.8253	11	iNaturalist
Sibon annulatus	Costa Rica	Limón	Caño Palma Biological Station	10.5959	-83.5285	0	Arteaga et al. 2018
Sibon annulatus	Costa Rica	Limón	Carrillo	10.15	-83.9167	718	Peters 1960
Sibon annulatus	Costa Rica	Limón	Comadre	9.7101	-82.8213	0	Solórzano 2001
Sibon annulatus	Costa Rica	Limón	Finca Curré	9.61435	-82.7096	25	SMF 101056
Sibon annulatus	Costa Rica	Limón	Guayacán	10.0645	-83.5433	460	Sheehy 2012
Sibon annulatus	Costa Rica	Limón	Guayacán de Siquirres	10.041	-83.546	722	Solórzano 2001
Sibon annulatus	Costa Rica	Limón	Jiménez	10.1579	-83.7797	560	iNaturalist
Sibon annulatus	Costa Rica	Limón	Kekoldi Indigenous Preserve	9.63842	-82.7975	137	iNaturalist
Sibon annulatus	Costa Rica	Limón	Parque Nacional Tortuguero	10.3961	-83.4857	17	iNaturalist
Sibon annulatus	Costa Rica	Limón	Refugio Nacional Gandoca-Manzanillo	9.59323	-82.6865	62	iNaturalist
Sibon annulatus	Costa Rica	Limón	Reserva Natural Pacuare	10.1685	-83.2365	10	iNaturalist
Sibon annulatus	Costa Rica	Limón	Río San Box	9.63227	-82.8601	45	Savage and McDiarmid 1992
Sibon annulatus	Costa Rica	Limón	Río Yuani	9.5327	-82.9801	94	Savage and McDiarmid 1992
Sibon annulatus	Costa Rica	Limón	San Miguel	10.0372	-83.331	23	Solórzano 2001
Sibon annulatus	Costa Rica	Limón	Siquirres	10.0954	-83.5085	140	Savage and McDiarmid 1992
Sibon annulatus	Costa Rica	Limón	Tortuguero	10.5421	-83.5027	5	Savage and McDiarmid 1992
Sibon annulatus	Costa Rica	Limón	Uatsi	9.62562	-82.8863	299	Solórzano 2001
Sibon annulatus	Costa Rica	Limón	Veragua Rainforest	9.9261	-83.1912	421	iNaturalist
Sibon annulatus	Costa Rica	San José	Finca Laguna	10.0797	-83.9731	1180	Savage and McDiarmid 1992
Sibon annulatus	Costa Rica	San José	Parque Nacional Braulio Carrillo	10.1601	-83.9559	708	Savage and McDiarmid 1992
Sibon annulatus	Honduras	Colón	Cabeceras del Río Plátano	15.3587	-85.2373	370	Lotzkat et al. 2012
Sibon annulatus	Honduras	Gracias a Dios	Pomokir	15.4881	-84.9595	150	Lotzkat et al. 2012
Sibon annulatus	Honduras	Gracias a Dios	Swabila	15.0642	-83.6146	9	McCranie 2006
Sibon annulatus	Nicaragua	Atlántico Norte	Campamento Los Monos	13.7517	-85.0367	850	Lotzkat et al. 2012
Sibon annulatus	Nicaragua	Jinotega	Pueblo Wiso, 0.5 km SE of	13.9933	-85.3267	200	Lotzkat et al. 2012
Sibon annulatus	Nicaragua	Matagalpa	Bilampí	13.0114	-85.2366	620	Lotzkat et al. 2012
Sibon annulatus	Nicaragua	Río San Juan	Caño Luis	11.3219	-84.7393	57	Sheehy 2012
Sibon annulatus	Nicaragua	Río San Juan	Río Indio	11.0482	-83.88	8	Arteaga et al. 2018
Sibon annulatus	Panama	Bocas del Toro	Changuinola Bonyic	9.35523	-82.593	108	MHCH 1945, MHCH 1982; Supplementary file 1
Sibon annulatus	Panama	Bocas del Toro	La Loma	9.11385	-82.2963	160	Savage and McDiarmid 1992
Sibon annulatus	Panama	Bocas del Toro	Punta Cauro	9.42644	-82.3484	0	iNaturalist
Sibon annulatus	Panama	Bocas del Toro	Snowy Cotinga House	9.39095	-82.5654	33	iNaturalist
Sibon annulatus	Panama	Comarca Ngäbe-Buglé	Bluefield	9.14336	-81.8767	9	Savage and McDiarmid 1992
Sibon ayerbeorum	Colombia	Cauca	El Tambo	2.771	-76.9802	1135	Vera-Pérez 2019
Sibon ayerbeorum	Colombia	Cauca	La Playa	2.69472	-76.9394	1418	Vera-Pérez 2019
Sibon ayerbeorum	Colombia	Chocó	Vereda Salero	5.36	-76.646	96	Echavarría-Rentería and Medina-Rangel 2021
Sibon ayerbeorum	Colombia	Risaralda	Alto Amurrapá	5.316	-76.153	1040	Bonilla and Moya 2021
Sibon ayerbeorum	Colombia	Valle del Cauca	La Loca	3.57656	-76.8803	658	CZI-R063; Supplementary file 1
Sibon ayerbeorum	Colombia	Valle del Cauca	La Riqueza	3.59874	-76.8918	621	CZI-R067; Supplementary file 1
Sibon ayerbeorum	Ecuador	Carchi	Cerro El Carmelo	0.89972	-78.448	803	iNaturalist, DHMECN 14936
Sibon ayerbeorum	Ecuador	Esmeraldas	Lote Rosero	0.495315	-79.1783	560	ZSFQ 5066; Supplementary file 1
Sibon canopy sp. nov.	Panama	Bocas del Toro	Bosque Protector Palo Seco	8.95635	-82.5181	800	MHCH 170; Supplementary file 1
Sibon canopy sp. nov.	Panama	Bocas del Toro	Casa de Ancón	8.8714	-82.4159	1010	MHCH 1067, SMF 86411, 86413, 86414; Supplementary file 1 and Lotzkat et al. 2012
Sibon canopy sp. nov.	Panama	Bocas del Toro	Río Changena	8.9785	-82.6901	1640	SMF 91578; Supplementary file 1; Lotzkat et al. 2012
Sibon canopy sp. nov.	Panama	Bocas del Toro	Río Changuinola	9.01527	-82.4364	280	Savage and McDiarmid 1992
Sibon canopy sp. nov.	Panama	Bocas del Toro	Río Culebra	8.90772	-82.3911	698	MHCH 220; Supplementary file 1
Sibon canopy sp. nov.	Panama	Chiriquí	Cerro Guayabo	8.7553	-82.2543	1250	SMF 90208; Supplementary file 1 and Lotzkat et al. 2012
Sibon canopy sp. nov.	Panama	Chiriquí	Lost and Found Hostel	8.6739	-82.2185	1320	Lotzkat et al. 2012
Sibon canopy sp. nov.	Panama	Chiriquí	Reserva Forestal La Fortuna	8.7776	-82.2092	1030	SMF 85077; Supplementary file 1 and Lotzkat et al. 2012
Sibon canopy sp. nov.	Panama	Chiriquí	Trail to Rio Hornito	8.67385	-82.2185	1320	SMF 88715; Supplementary file 1
Sibon canopy sp. nov.	Panama	Coclé	Cascada El Tigrero	8.68186	-80.5743	802	iNaturalist
Sibon canopy sp. nov.	Panama	Coclé	Cerro Gaital, La Pintada (type locality)	8.70874	-80.4241	543	MHCH 3110; Supplementary file 1
Sibon canopy sp. nov.	Panama	Coclé	El Copé	8.4386	-80.6792	340	Photo by Josh Vandermeulen
Sibon canopy sp. nov.	Panama	Coclé	Parque Nacional General Omar Torrijos	8.6667	-80.6167	980	Sheehy 2012
Sibon canopy sp. nov.	Panama	Coclé	Penonome	8.70874	-80.4241	543	Photo by Abel Batista
Sibon canopy sp. nov.	Panama	Coclé	Valle de Antón	8.61257	-80.1412	600	Peters 1960
Sibon canopy sp. nov.	Panama	Comarca Ngäbe-Buglé	Cabeceras del Río Chiriquí Mali	8.78906	-82.2155	1080	MHCH 2363, 2364, SMF 90207, 91579; Supplementary file 1
Sibon canopy sp. nov.	Panama	Comarca Ngäbe-Buglé	Guayabito	8.5494	-81.4847	1510	SMF 91580; Supplementary file 1 and Lotzkat et al. 2012
Sibon canopy sp. nov.	Panama	Comarca Ngäbe-Buglé	Reserva Forestal La Fortuna	8.77764	-82.2092	1030	SMF 85077, 85078; Supplementary file 1
Sibon canopy sp. nov.	Panama	Panama	Cerro La Gaita	8.62936	-80.0735	1148	Ray and Ruback 2015
Sibon canopy sp. nov.	Panama	Veraguas	Alto de Piedra	8.51305	-81.1004	640	iNaturalist
Sibon canopy sp. nov.	Panama	Veraguas	Cerro Mariposa	8.5249	-81.1328	680	SMF 89596, 89597, MHCH 2365; Supplementary file 1 and Lotzkat et al. 2012
Sibon canopy sp. nov.	Panama	Veraguas	Cerro Negro	8.569	-81.0989	900	SMF 89786, 90023, 90024; Supplementary file 1 and Lotzkat et al. 2012
Sibon canopy sp. nov.	Panama	Veraguas	Parque Nacional Santa Fe	8.54041	-81.1286	621	iNaturalist
Sibon canopy sp. nov.	Panama	Veraguas	Río Bermejo	8.54454	-81.1165	500	iNaturalist
Sibon canopy sp. nov.	Panama	Veraguas	Río Concepción	8.67343	-80.9427	227	Savage and McDiarmid 1992
Sibon irmelindicaprioae sp. nov.	Colombia	Antioquia	Finca la Bonga	7.68616	-76.3747	666	Meneses-Pelayo et al. 2018
Sibon irmelindicaprioae sp. nov.	Colombia	Antioquia	Mutatá, Finca La Bonga	7.34609	-76.486	642	UIS R-3701; Meneses-Pelayo et al. 2019
Sibon irmelindicaprioae sp. nov.	Colombia	Cesar	Alto de la Paz	7.9562	-73.348	1109	ICN 12020I; Meneses-Pelayo et al. 2016
Sibon irmelindicaprioae sp. nov.	Colombia	Chocó	El Afirmado	5.6419	-77.0755	346	COLZOOCH-H 0792; Meneses-Pelayo et al. 2016
Sibon irmelindicaprioae sp. nov.	Colombia	Chocó	Morromico Reserve	5.90239	-77.2913	347	This work, Fig. 2b
Sibon irmelindicaprioae sp. nov.	Colombia	Santander	Finca La Esperanza	6.99673	-73.4148	688	UIS R-3514; Ramírez Pinilla and Meneses Pelayo 2021
Sibon irmelindicaprioae sp. nov.	Colombia	Santander	Vereda La Colorada	6.7925	-73.4795	951	UIS R-2796; Meneses-Pelayo et al. 2016
Sibon irmelindicaprioae sp. nov.	Colombia	Santander	Vereda Varsovia	6.83173	-73.3908	1480	UIS-R 4443; Ramírez Pinilla and Meneses Pelayo 2021
Sibon irmelindicaprioae sp. nov.	Panama	Comarca Emberá-Wounaan	Cerro Bailarín (type locality)	7.69385	-78.0427	852	MHCH 3143; Supplementary file 1
Sibon irmelindicaprioae sp. nov.	Panama	Comarca Emberá-Wounaan	Cerro Garra Garra	7.764	-78.1006	655	MHCH 3146; Supplementary file 1
Sibon irmelindicaprioae sp. nov.	Panama	Comarca Emberá-Wounaan	Cerro Tacarcuna	8.18042	-77.3051	1100	Savage and McDiarmid 1992
Sibon irmelindicaprioae sp. nov.	Panama	Darién	Chucantí	8.79773	-78.4622	1295	MHCH 3111; Supplementary file 1
Sibon irmelindicaprioae sp. nov.	Panama	Darién	Humedal Laguna de Matusagaratí	8.20809	-78.0479	420	Savage and McDiarmid 1992
Sibon irmelindicaprioae sp. nov.	Panama	Darién	Quebrada El Tigre	8.04233	-77.2263	1149	IIAP CR49
Sibon irmelindicaprioae sp. nov.	Panama	Panama	Ambroya	8.89198	-78.5605	906	MHCH 3145; Supplementary file 1
Sibon irmelindicaprioae sp. nov.	Panama	Panama	Pirré	7.99695	-77.7104	550	MHCH 3120; Supplementary file 1
Sibon leucomelas	Colombia	Antioquia	Buenos Aires	6.72722	-76.0058	1534	iNaturalist
Sibon leucomelas	Colombia	Antioquia	Cañasgordas	6.74555	-76.0256	1379	iNaturalist
Sibon leucomelas	Colombia	Antioquia	Caño Bijara	7.17725	-76.4217	220	iNaturalist
Sibon leucomelas	Colombia	Antioquia	Dabeiba	7.00634	-76.261	600	iNaturalist
Sibon leucomelas	Colombia	Antioquia	La Unión	4.53801	-76.1153	1000	iNaturalist
Sibon leucomelas	Colombia	Antioquia	Orquídeas	6.65512	-76.3366	1180	iNaturalist
Sibon leucomelas	Colombia	Antioquia	Santa Teresa, 4 km E of	7.18654	-76.3725	721	iNaturalist
Sibon leucomelas	Colombia	Cauca	Argelia	2.2558	-77.249	1218	Photo by Jhonatan Bolaños
Sibon leucomelas	Colombia	Cauca	Buenaventura (type locality)	3.88401	-76.9899	38	BMNH 1895.11.16.16; Boulenger 1896
Sibon leucomelas	Colombia	Cauca	El Crucero	3.9309	-76.9745	45	iNaturalist
Sibon leucomelas	Colombia	Cauca	Parque Nacional Munchique	2.771	-76.9802	1135	Vera-Pérez et al. 2018
Sibon leucomelas	Colombia	Cauca	San Cipriano	3.83405	-76.8923	116	iNaturalist
Sibon leucomelas	Colombia	Chocó	Andagoya	5.09972	-76.6968	62	Peters 1960
Sibon leucomelas	Colombia	Chocó	Angostura	5.32667	-76.4447	157	Rengifo Mosquera et al. 2022
Sibon leucomelas	Colombia	Chocó	Bahía Solano	6.22664	-77.4097	100	iNaturalist
Sibon leucomelas	Colombia	Chocó	Cole	5.4136	-76.4153	157	Peters 1960
Sibon leucomelas	Colombia	Chocó	Morromico Reserve	5.87411	-77.2945	30	This work
Sibon leucomelas	Colombia	Chocó	Pacurita	5.68638	-76.6333	44	Rengifo Mosquera et al. 2022
Sibon leucomelas	Colombia	Chocó	Quebrada El Tigre	8.03166	-77.2242	1071	Urrutia and Rentería Moreno 2021
Sibon leucomelas	Colombia	Chocó	Río San Juan	5.30806	-76.3173	288	Peters 1960
Sibon leucomelas	Colombia	Chocó	Samurindó	5.5875	-76.6542	49	Rengifo Mosquera et al. 2022
Sibon leucomelas	Colombia	Chocó	San José del Palmar	4.98093	-76.2565	730	ICN 7175
Sibon leucomelas	Colombia	Chocó	San Roque	5.98009	-76.889	90	Rengifo Mosquera et al. 2022
Sibon leucomelas	Colombia	Chocó	Vereda Salero	5.36028	-76.6458	92	Rengifo Mosquera et al. 2022
Sibon leucomelas	Colombia	Risaralda	Montezuma Rainforest Ecolodge	5.23104	-76.083	1341	iNaturalist
Sibon leucomelas	Colombia	Risaralda	Santa Cecilia	5.29995	-76.2167	508	Peters 1960
Sibon leucomelas	Colombia	Valle del Cauca	Anchicayá	3.54127	-76.8783	641	CZI-R158; Supplementary file 1
Sibon leucomelas	Colombia	Valle del Cauca	Bajo Anchicayá	3.60928	-76.8885	348	UV-C 5386; Supplementary file 1
Sibon leucomelas	Colombia	Valle del Cauca	Bosque de Yotoco	3.87552	-76.4362	1600	Castro-Herrera et al. 2007
Sibon leucomelas	Colombia	Valle del Cauca	Campamento Yatacué	3.57472	-76.8778	598	CZI-R029; Supplementary file 1
Sibon leucomelas	Colombia	Valle del Cauca	Dagua	3.83333	-76.7501	1190	Cedano-Cruz et al. 2022
Sibon leucomelas	Colombia	Valle del Cauca	El Cauchal	3.63416	-77.0594	47	CPZ-UV 05823; Supplementary file 1
Sibon leucomelas	Colombia	Valle del Cauca	El Danubio	3.6069	-76.8789	300	iNaturalist
Sibon leucomelas	Colombia	Valle del Cauca	El Danubio, 6 km S of	3.55087	-76.8899	690	iNaturalist
Sibon leucomelas	Colombia	Valle del Cauca	Loboguerrero	3.75116	-76.6615	672	Stasiukynas et al. 2021
Sibon leucomelas	Colombia	Valle del Cauca	Quebrada la Elsa	3.5747	-76.7646	860	UV-C 7620; Supplementary file 1
Sibon leucomelas	Colombia	Valle del Cauca	Racamandapa	3.55418	-76.5535	1600	iNaturalist
Sibon leucomelas	Colombia	Valle del Cauca	Represa Murrapal	3.55283	-76.9808	321	CZI-R075; Supplementary file 1
Sibon leucomelas	Colombia	Valle del Cauca	Restrepo	3.85778	-76.5418	1624	iNaturalist
Sibon leucomelas	Colombia	Valle del Cauca	Sombrerillos	3.78525	-76.7803	625	CPZ-UV 05914; Supplementary file 1
Sibon leucomelas	Panama	Chiriquí	Caldera	8.73645	-82.3235	1221	MHCH 3121; Supplementary file 1
Sibon leucomelas	Panama	Coclé	Cerro Gaital	8.62406	-80.1183	1002	SINAP 2020
Sibon leucomelas	Panama	Coclé	Cerro Miguel	8.9462	-80.2658	138	CH 5296
Sibon leucomelas	Panama	Coclé	El Calvario	8.6736	-80.5886	690	iNaturalist
Sibon leucomelas	Panama	Coclé	Parque Nacional General Omar Torrijos	8.6667	-80.6167	995	Sheehy 2012
Sibon leucomelas	Panama	Coclé	Parque Nacional General Omar Torrijos	8.6194	-80.5792	413	USNM 579854
Sibon leucomelas	Panama	Colón	El Dorado	8.82297	-80.6619	241	iNaturalist
Sibon leucomelas	Panama	Colón	Petaquilla	8.93217	-80.6939	62	MHCH1505
Sibon leucomelas	Panama	Colón	Valle de Antón	8.60873	-80.1308	590	iNaturalist
Sibon leucomelas	Panama	Comarca Emberá-Wounaan	Cerro Tacarcuna	8.18042	-77.3051	1100	KU 75751
Sibon leucomelas	Panama	Comarca Emberá-Wounaan	Tacarcuna Village	8.19964	-77.4127	400	USNM 141828
Sibon leucomelas	Panama	Darién	1.2 km above Río Imamadó	7.48526	-77.8935	600	Cadle and Myers 2003
Sibon leucomelas	Panama	Darién	Cabecera del Río Cana	7.762	-77.724	1241	CH 9135
Sibon leucomelas	Panama	Darién	Cerro Sapo, north slope	7.98813	-78.3606	600	KU 112475; VertNet
Sibon leucomelas	Panama	Darién	Chepigana	8.79103	-78.453	800	iNaturalist
Sibon leucomelas	Panama	Darién	Rancho Frío Field station	7.9632	-77.7043	1267	Photo by Abel Batista
Sibon leucomelas	Panama	Panama	Altos de Pedregal	9.10668	-79.431	200	iNaturalist
Sibon leucomelas	Panama	Panama	Ambroya	8.89198	-78.5605	906	SMF 97592; Supplementary file 1
Sibon leucomelas	Panama	Panama	Campana	8.69378	-79.921	730	iNaturalist
Sibon leucomelas	Panama	Panama	Centro Mamoní	9.32058	-79.1433	220	iNaturalist
Sibon leucomelas	Panama	Panama	Chagres	9.2812	-79.4763	221	Peters 1960
Sibon leucomelas	Panama	Panama	Corozal	8.98894	-79.5744	48	Peters 1960
Sibon leucomelas	Panama	Panama	La Chitra, 3 km N of	9.29169	-79.3185	460	iNaturalist
Sibon leucomelas	Panama	Panama	Los Altos de Cerro Azul	9.21557	-79.3931	840	iNaturalist
Sibon leucomelas	Panama	Panama	Madden Dam	9.21126	-79.6163	100	Peters 1960
Sibon leucomelas	Panama	Panama	Naranjal	8.66017	-80.0319	600	iNaturalist
Sibon leucomelas	Panama	Panama	Panama City	9.06535	-79.5061	100	Peters 1960
Sibon leucomelas	Panama	Panama	Pedro Miguel	9.01862	-79.6123	49	Peters 1960
Sibon leucomelas	Panama	Panama	Río Terable	9.28399	-78.9838	322	MHCH 3149, Supplementary file 1
Sibon leucomelas	Panama	Veraguas	Alto de Piedra	8.50711	-81.114	824	iNaturalist
Sibon leucomelas	Panama	Veraguas	Antón, 80 km NW of	8.75676	-80.8252	200	KU 112478
Sibon leucomelas	Panama	Veraguas	Cerro Mariposa	8.51224	-81.1214	933	SMF 89598; Supplementary file 1
Sibon leucomelas	Panama	Veraguas	El Salto La Culaca	8.52481	-81.0596	379	iNaturalist
Sibon marleyae sp. nov.	Colombia	Chocó	San José del Palmar	4.9684	-76.2275	1338	Meneses-Pelayo et al. 2016
Sibon marleyae sp. nov.	Colombia	Valle del Cauca	Campamento Yatacué	3.57472	-76.8778	598	CZI-R009
Sibon marleyae sp. nov.	Colombia	Valle del Cauca	Represa Murrapal	3.55283	-76.9808	321	CZI-R051
Sibon marleyae sp. nov.	Colombia	Valle del Cauca	Zaragoza, 11 km N of	3.95523	-76.8284	131	iNaturalist
Sibon marleyae sp. nov.	Ecuador	Carchi	Tobar Donoso	1.18993	-78.5041	223	Yánez-Muñoz et al. 2009
Sibon marleyae sp. nov.	Ecuador	Carchi	Transecto 4	0.91556	-78.4948	260	DHMECN 6710
Sibon marleyae sp. nov.	Ecuador	Esmeraldas	Bilsa Biological Reserve	0.35916	-79.7006	463	Ortega-Andrade et al. 2010
Sibon marleyae sp. nov.	Ecuador	Esmeraldas	Bosque El Edén	0.87882	-78.5698	790	DHMECN 16048
Sibon marleyae sp. nov.	Ecuador	Esmeraldas	Cabeceras Río Dógola	0.37284	-79.7348	555	QCAZ 16976; Supplementary file 1
Sibon marleyae sp. nov.	Ecuador	Esmeraldas	Durango	1.04161	-78.6266	245	ZSFQ 5067; Supplementary file 1
Sibon marleyae sp. nov.	Ecuador	Esmeraldas	Itapoa Reserve	0.51307	-79.134	321	MZUTI 3034; Supplementary file 1
Sibon marleyae sp. nov.	Ecuador	Esmeraldas	Jevon Forest Biological Station	0.497948	-79.1013	249	iNaturalist
Sibon marleyae sp. nov.	Ecuador	Esmeraldas	Lote Rosero	0.495315	-79.1783	560	ZSFQ 5069; Supplementary file 1
Sibon marleyae sp. nov.	Ecuador	Manabí	Sendero Blanco	0.34836	-79.7133	519	QCAZ 16973; Supplementary file 1
Sibon marleyae sp. nov.	Ecuador	Esmeraldas	Sendero Toronja	0.34746	-79.7074	577	QCAZ 16975; Supplementary file 1
Sibon marleyae sp. nov.	Ecuador	Esmeraldas	Verdecanandé (type locality)	0.50149	-79.0502	251	ZSFQ 5065; Supplementary file 1
Sibon marleyae sp. nov.	Ecuador	Manabí	Cerro Pata de Pájaro	0.033333	-79.9833	328	Photo by Carlos Robles
Sibon marleyae sp. nov.	Ecuador	Manabí	Río Rompe Frente	0.3513	-79.7143	505	QCAZ 16974; Supplementary file 1
Sibon vieirai sp. nov.	Colombia	Cauca	López de Micay	2.8458	-77.248	45	Photo by Danny Santana
Sibon vieirai sp. nov.	Colombia	Cauca	Timbiquí	2.67342	-77.6099	77	Photo by Milton Pertiaga
Sibon vieirai sp. nov.	Colombia	Nariño	Barbacoas	1.6558	-78.1653	109	MHUA 14082
Sibon vieirai sp. nov.	Colombia	Nariño	Bosque del Acueducto	2.037	-78.6402	16	Pinto-Erazo et al. 2020
Sibon vieirai sp. nov.	Colombia	Nariño	Cabo Manglares	1.65008	-78.9693	9	Higuera Rojas et al. 2021
Sibon vieirai sp. nov.	Colombia	Nariño	El Palmichal	2.03201	-78.6563	16	Pinto-Erazo et al. 2020
Sibon vieirai sp. nov.	Colombia	Nariño	Estación Mar Agrícola	1.67858	-78.755	8	Pinto-Erazo et al. 2020
Sibon vieirai sp. nov.	Colombia	Nariño	La Primavera	2.04097	-78.6536	16	Pinto-Erazo et al. 2020
Sibon vieirai sp. nov.	Colombia	Nariño	Reserva Natural El Pangán	1.34123	-78.1128	1118	Photo by Carlos Luna
Sibon vieirai sp. nov.	Colombia	Nariño	Reserva Natural Río Ñambí	1.28313	-78.0932	1180	Bacca Cortes et al. 2019
Sibon vieirai sp. nov.	Colombia	Nariño	Ricaurte	1.21165	-77.9952	1189	Peters 1960
Sibon vieirai sp. nov.	Colombia	Nariño	Universidad Nacional de Colombia, Sede Nariño	1.60614	-78.73	17	Pinto-Erazo et al. 2020
Sibon vieirai sp. nov.	Ecuador	Bolívar	La Unión del Congreso	-1.3201	-79.2538	999	iNaturalist
Sibon vieirai sp. nov.	Ecuador	Carchi	La Primavera	0.79502	-78.2176	1228	ZSFQ 5070; Supplementary file 1
Sibon vieirai sp. nov.	Ecuador	Carchi	Tobar Donoso	1.18993	-78.5041	223	Torres-Carvajal et al. 2012
Sibon vieirai sp. nov.	Ecuador	Cotopaxi	Bosque Privado El Jardín de los Sueños	-0.83142	-79.2134	349	MZUTI 4810; Supplementary file 1
Sibon vieirai sp. nov.	Ecuador	Cotopaxi	Yakusinchi	-0.95052	-79.1454	506	Photo by Jane Sloan
Sibon vieirai sp. nov.	Ecuador	Esmeraldas	1 km up Río San Miguel	0.744925	-78.9239	21	MCZ 153819
Sibon vieirai sp. nov.	Ecuador	Esmeraldas	Bilsa Biological Reserve	0.35916	-79.7006	463	Ortega-Andrade et al. 2010
Sibon vieirai sp. nov.	Ecuador	Esmeraldas	Bosque Protector La Perla	-0.01394	-79.3877	229	Ulloa et al. 1991
Sibon vieirai sp. nov.	Ecuador	Esmeraldas	Caimito	0.696761	-80.09	136	QCAZ 5734; Torres-Carvajal et al. 2019
Sibon vieirai sp. nov.	Ecuador	Esmeraldas	Canandé Biological Reserve	0.5258	-79.2088	310	Arteaga et al. 2018
Sibon vieirai sp. nov.	Ecuador	Esmeraldas	Carondelet	1.1261	-78.7622	16	Peters 1960
Sibon vieirai sp. nov.	Ecuador	Esmeraldas	Centro de Fauna Silvestre James Brown	-0.02008	-79.3666	234	Photo by Salvador Palacios
Sibon vieirai sp. nov.	Ecuador	Esmeraldas	Cerro Zapallo	0.899063	-79.5273	400	iNaturalist
Sibon vieirai sp. nov.	Ecuador	Esmeraldas	Chipa	0.70724	-80.0427	33	Vázquez et al. 2005
Sibon vieirai sp. nov.	Ecuador	Esmeraldas	Durango, 4 km N of	1.1171	-78.5936	130	QCAZ 7985; Supplementary file 1
Sibon vieirai sp. nov.	Ecuador	Esmeraldas	El Aguacate	0.65348	-80.0519	43	Arteaga et al. 2018
Sibon vieirai sp. nov.	Ecuador	Esmeraldas	Esmeraldas–Quinindé road	0.801632	-79.5884	17	QCAZ 5851; Torres-Carvajal et al. 2019
Sibon vieirai sp. nov.	Ecuador	Esmeraldas	Finca Palmicultura La Capitana	0.452432	-79.173	156	QCAZ 11608; Torres-Carvajal et al. 2019
Sibon vieirai sp. nov.	Ecuador	Esmeraldas	Gualpi	0.566844	-79.05	417	This work
Sibon vieirai sp. nov.	Ecuador	Esmeraldas	Gualpi	0.562741	-79.0726	233	This work
Sibon vieirai sp. nov.	Ecuador	Esmeraldas	Hacienda Cucaracha	0.12752	-79.4708	119	This work
Sibon vieirai sp. nov.	Ecuador	Esmeraldas	Itapoa Reserve	0.51307	-79.134	431	MZUTI 3911; Supplementary file 1
Sibon vieirai sp. nov.	Ecuador	Esmeraldas	Lita–San Lorenzo road	1.26219	-78.7953	42	Arteaga et al. 2018
Sibon vieirai sp. nov.	Ecuador	Esmeraldas	Lote Rosero	0.49532	-79.1783	560	This work
Sibon vieirai sp. nov.	Ecuador	Esmeraldas	Lote Salvadores	0.35877	-79.6478	290	This work
Sibon vieirai sp. nov.	Ecuador	Esmeraldas	Muelle de San Lorenzo	1.3135	-78.83	5	iNaturalist
Sibon vieirai sp. nov.	Ecuador	Esmeraldas	Partidero-Poza Honda	0.60075	-79.999	5	Vázquez et al. 2005
Sibon vieirai sp. nov.	Ecuador	Esmeraldas	Reserva FCAT	0.372973	-79.6653	578	iNaturalist
Sibon vieirai sp. nov.	Ecuador	Esmeraldas	San Javier	1.0661	-78.7772	23	Peters 1960
Sibon vieirai sp. nov.	Ecuador	Esmeraldas	Tundaloma Lodge (type locality)	1.18236	-78.7525	74	ZSFQ 5071; Supplementary file 1
Sibon vieirai sp. nov.	Ecuador	Esmeraldas	Verdecanandé	0.523954	-79.0123	344	This work
Sibon vieirai sp. nov.	Ecuador	Imbabura	Cuellaje	0.40062	-78.5254	1803	iNaturalist
Sibon vieirai sp. nov.	Ecuador	Imbabura	García Moreno	0.23415	-78.6262	1432	USNM 210975; VertNet
Sibon vieirai sp. nov.	Ecuador	Imbabura	La Peña	0.655924	-78.2425	1718	iNaturalist
Sibon vieirai sp. nov.	Ecuador	Imbabura	Manduriacu	0.25522	-78.9253	1023	iNaturalist
Sibon vieirai sp. nov.	Ecuador	Imbabura	Paramba	0.81671	-78.35	698	Peters 1960
Sibon vieirai sp. nov.	Ecuador	Imbabura	Selva Alegre	0.26667	-78.5833	1299	Arteaga et al. 2018
Sibon vieirai sp. nov.	Ecuador	Los Ríos	Bosque Protector Pedro Franco Dávila	-1.24568	-79.66	46	Cruz-García 2017
Sibon vieirai sp. nov.	Ecuador	Los Ríos	Centro Científico Río Palenque	-0.58822	-79.363	170	USNM 285498, 285500; Supplementary file 1
Sibon vieirai sp. nov.	Ecuador	Los Ríos	Hacienda Cerro Chico	-0.62444	-79.4294	156	ZSFQ 5073, USNM 285501; Supplementary file 1
Sibon vieirai sp. nov.	Ecuador	Los Ríos	Jauneche	-1.33333	-79.5833	41	MZUA.RE.0328; Supplementary file 1
Sibon vieirai sp. nov.	Ecuador	Los Ríos	Macul	-1.1298	-79.6573	65	MZUA.RE.0174; Supplementary file 1
Sibon vieirai sp. nov.	Ecuador	Los Ríos	Pambilar	-0.83032	-79.4803	98	Peters 1960
Sibon vieirai sp. nov.	Ecuador	Manabí	Cerro Pata de Pájaro	0.02922	-79.9728	255	Observation by Alejandro Arteaga
Sibon vieirai sp. nov.	Ecuador	Manabí	El Carmen	-0.2667	-79.4333	253	QCAZ 7365; Torres-Carvajal et al. 2019
Sibon vieirai sp. nov.	Ecuador	Manabí	El Carmen–Pedernales road	-0.090799	-79.7572	279	Observation by Alejandro Arteaga
Sibon vieirai sp. nov.	Ecuador	Manabí	Hacienda Siberia	0.22094	-79.8834	16	Hamilton et al. 2005
Sibon vieirai sp. nov.	Ecuador	Manabí	La Crespa	-0.33592	-79.7585	223	iNaturalist
Sibon vieirai sp. nov.	Ecuador	Manabí	La Dolorosa	-0.371236	-79.917	200	iNaturalist
Sibon vieirai sp. nov.	Ecuador	Manabí	Muisne, 20 Km N of	0.699674	-79.9156	66	QCAZ 817; Torres-Carvajal et al. 2019
Sibon vieirai sp. nov.	Ecuador	Manabí	Portoviejo–Pichincha road	-1.05217	-79.9424	213	Observation by Alejandro Arteaga
Sibon vieirai sp. nov.	Ecuador	Manabí	Reserva Biológica Tito Santos	-0.15391	-80.1955	52	Hamilton et al. 2005
Sibon vieirai sp. nov.	Ecuador	Manabí	Reserva Jama Coaque	-0.11556	-80.1247	299	MZUTI 5342; Supplementary file 1
Sibon vieirai sp. nov.	Ecuador	Manabí	Zapallo	-0.445387	-79.9944	158	iNaturalist
Sibon vieirai sp. nov.	Ecuador	Manabí	Zapote	-0.375778	-79.606	154	QCAZ 14502
Sibon vieirai sp. nov.	Ecuador	Pichincha	Cristóbal Colón	-0.047267	-79.1768	458	Observation by Alejandro Arteaga
Sibon vieirai sp. nov.	Ecuador	Pichincha	Curipogio	0.13112	-78.6763	1171	Arteaga et al. 2018
Sibon vieirai sp. nov.	Ecuador	Pichincha	El Monte Lodge	-0.06912	-78.7619	1316	Photo by Sina Amini
Sibon vieirai sp. nov.	Ecuador	Pichincha	Estación Puerto Quito OCP	0.08137	-78.9665	795	Valencia & Garzón 2011
Sibon vieirai sp. nov.	Ecuador	Pichincha	Finca Ecológica Orongo	0.14676	-78.657	1594	QCAZ 15725; Torres-Carvajal et al. 2019
Sibon vieirai sp. nov.	Ecuador	Pichincha	Hacienda La Hesperia	-0.353706	-78.8484	1362	Brouwer 2018
Sibon vieirai sp. nov.	Ecuador	Pichincha	Hacienda La Joya	0.08333	-78.9833	764	Cisneros-Heredia 2007
Sibon vieirai sp. nov.	Ecuador	Pichincha	Las Tolas	0.03337	-78.8061	1196	DHMECN 2009
Sibon vieirai sp. nov.	Ecuador	Pichincha	Maquipucuna	0.12436	-78.6292	1280	QCAZ 15722; Torres-Carvajal et al. 2019
Sibon vieirai sp. nov.	Ecuador	Pichincha	Mashpi lodge	0.16604	-78.8754	978	Observation by Alejandro Arteaga
Sibon vieirai sp. nov.	Ecuador	Pichincha	Milpe Bird Sanctuary	0.03249	-78.8658	113	Observation by Alejandro Arteaga
Sibon vieirai sp. nov.	Ecuador	Pichincha	Nanegalito	0.06181	-78.6821	1601	Cisneros-Heredia 2007
Sibon vieirai sp. nov.	Ecuador	Pichincha	Playa Rica	0.17469	-78.6238	1116	QCAZ 7424; Torres-Carvajal et al. 2019
Sibon vieirai sp. nov.	Ecuador	Pichincha	Puerto Quito	0.11667	-79.2666	143	Cisneros-Heredia 2007
Sibon vieirai sp. nov.	Ecuador	Pichincha	Rancho Suamox	0.107055	-79.166	345	Photo by Rafael Ferro
Sibon vieirai sp. nov.	Ecuador	Pichincha	Río Caoni	0.075	-79.051	570	QCAZ 11033; Torres-Carvajal et al. 2019
Sibon vieirai sp. nov.	Ecuador	Pichincha	Río Pitzará	0.131694	-79.0391	640	QCAZ 3538; Torres-Carvajal et al. 2019
Sibon vieirai sp. nov.	Ecuador	Pichincha	Rio Silanche Bird Sanctuary	0.14642	-79.142	202	QCAZ 17610; Torres-Carvajal et al. 2019
Sibon vieirai sp. nov.	Ecuador	Pichincha	San Bernabé	-0.014094	-79.0873	593	Observation by Alejandro Arteaga
Sibon vieirai sp. nov.	Ecuador	Pichincha	Selva Virgen	0.10974	-79.1855	341	Observation by Alejandro Arteaga
Sibon vieirai sp. nov.	Ecuador	Pichincha	Vicinities of Los Bancos	0.036559	-78.9114	1009	Observation by Alejandro Arteaga
Sibon vieirai sp. nov.	Ecuador	Santo Domingo de los Tsáchilas	Alluriquín, 5.4 km W of	-0.308731	-79.0397	709	KU 179508; VertNet
Sibon vieirai sp. nov.	Ecuador	Santo Domingo de los Tsáchilas	Centro de Interpretación Otongachi	-0.33181	-78.9381	915	QCAZ 5659; Supplementary file 1
Sibon vieirai sp. nov.	Ecuador	Santo Domingo de los Tsáchilas	Finca la Esperanza	-0.2716	-79.1057	616	USNM 210976; VertNet
Sibon vieirai sp. nov.	Ecuador	Santo Domingo de los Tsáchilas	Hostería Tinalandia	-0.30316	-79.052	752	QCAZ 11119; Torres-Carvajal et al. 2019
Sibon vieirai sp. nov.	Ecuador	Santo Domingo de los Tsáchilas	La Unión del Toachi	-0.319944	-78.9588	900	QCAZ 5713; Torres-Carvajal et al. 2019
Sibon vieirai sp. nov.	Ecuador	Santo Domingo de los Tsáchilas	Palmar del Bimbe	-0.50984	-79.274	355	iNaturalist
Sibon vieirai sp. nov.	Ecuador	Santo Domingo de los Tsáchilas	Rancho Santa Teresita	-0.25277	-79.3795	288	USNM 283534; Supplementary file 1 and Arteaga et al. 2018
Sibon vieirai sp. nov.	Ecuador	Santo Domingo de los Tsáchilas	Santo Domingo	-0.26291	-79.1531	567	Peters 1960

## Sheet: References
References not cited in main article text
Almendáriz A, Simmons JE, Brito J, Vaca-Guerrero J (2014) Overview of the herpetofauna of the unexplored Cordillera del Cóndor of Ecuador. Amphibian & Reptile Conservation 8: 45–64.
Bacca Cortes N, Guerrero A, García M (2019) Línea base especies amenazadas priorizadas anfibios y aves “Construcción Participativa del Plan de Manejo de la Reserva Natural Río Ñambí.” Patrimonio Natural, Bogotá, 12 pp.
Betancourt R, Romo F, Chungandro D, Baldeón P (2018) Anfibios y reptiles del valle del Río Quimi, estribaciones de la Cordillera del Cóndor, Zamora Chinchipe, Ecuador. Field guides of the Field Museum of Natural History, Chicago, 24 pp.
Brouwer D (2018) La Hesperia Reserve herpetofauna list. Hacienda La Hesperia, Tandapi, 2 pp.
Castro-Herrera F, Bolívar-García W, Herrera-Montes MI (2007) Guía de los anfibios y reptiles del Bosque de Yotoco, Valle del Cauca, Colombia. Universidad del Valle, Cali, 70 pp.
Cisneros-Heredia DF (2007) Distribution and natural history of the Ecuadorian snake Dipsas an-diana (Boulenger, 1896) (Colubridae: Dipsadinae) with considerations on its conservation status. Russian Journal of Herpetology 14: 199–202.
Cruz-García K (2017) Diversidad y preferencia de microhabitats de la herpetofauna del bosque protector “Pedro Franco Dávila” (Jauneche) y del área provincial natural de recreación “Cerro de Hayas” (Naranjal). BSc thesis, Guayaquil, Universidad de Guayaquil, 94 pp.
Hamilton P, Mouette C, Almendáriz A (2005) Análisis inicial de la herpetofauna en bosques secos y húmedos en la Costa de Ecuador. Escuela Politécnica Nacional, Quito, 17 pp.
Higuera Rojas DF, Eguis-Avendaño JA, Peñuela-Díaz GM, Carvajal-Cogollo JE (2021) Reptiles y aves del Distrito de Manejo Integrado Cabo Manglares Bajo Mira-Frontera, Pacífico colombiano. Biota Colombiana 22(2): 182–189. https://doi.org/10.21068/c2021.v22n02a12
McCranie JR (2006) New species of Sibon (Squamata: Colubridae) from northeastern Honduras. Journal of Herpetology 40(1): 16–21. https://doi.org/10.1670/76-05N.1
MECN JOCOTOCO, ECOMINGA (2013) Herpetofauna en áreas prioritarias para la conservación: el sistema de reservas Jocotoco y Ecominga. Museo Ecuatoriano de Ciencias Natura-les, Quito, 408 pp.
Ortega-Andrade HM, Bermingham J, Aulestia C, Paucar C (2010) Herpetofauna of the Bilsa Biological Station, province of Esmeraldas, Ecuador. Check List 6(1): 119–154. https://doi.org/10.15560/6.1.119
Pinto-Erazo MA, Calderón Espinosa ML, Medina Rangel GF, Méndez Galeano MA (2020) Herpetofauna from two municipalities of southwestern Colombia. Biota Colombiana 21(1): 41–57. https://doi.org/10.21068/c2020.v21n01a04
Ray JM, Ruback P (2015) Updated checklists of snakes for the provinces of Panamá and Panamá Oeste, Republic of Panama. Mesoamerican Herpetology 2: 168–188.
Rengifo Mosquera JT, Rengifo Palacios MY, Rivas Albornoz LM (2022) Colección Científica de Referencia Zoológica del Chocó-Herpetología. Version 17.4. Universidad Tecnológica del Chocó. Occurrence dataset https://doi.org/10.15472/sz41lm [accessed via GBIF.org on 22 Ju-ly 2022]
Savage JM, McDiarmid RW (1992) Rediscovery of the Central American colubrid snake, Sibon argus, with comments on related species from the region. Copeia 1992(2): 421–432. https://doi.org/10.2307/1446202
Stasiukynas DC, Mejía A, Lizarazo J (2021) Roads to the sea: A case study on the impacts on wildlife and the environment from two contemporary roads of Colombia. Trilogía Ciencia Tecnología Sociedad 13: 1–9. https://doi.org/10.22430/21457778.1637
Torres-Carvajal O, Pazmiño-Otamendi G, Salazar-Valenzuela D (2019) Reptiles of Ecuador: A resource-rich online portal, with dynamic checklists and photographic guides. Amphibian & Reptile Conservation 13: 209–229.
Ulloa R, Suárez P, Campos F, Zak V, Vásquez M (1991) Plan de Manejo del Bosque Protector La Perla. EcoCiencia, Quito.
Valencia JA, Garzón K (2011) Guía de anfibios y reptiles en ambientes cercanos a las estaciones del OCP. Fundación Herpetológica Gustavo Orcés, Quito, 268 pp.
Vázquez MA, Freire JF, Suárez L (2005) Biodiversidad en el suroccidente de la provincia de Esmeraldas: un reporte de las evaluaciones ecológicas y socioeconómicas rápidas. EcoCiencia y MAE, Quito, 65 pp.
Yánez-Muñoz MH, Altamirano M, Oyataga L (2009) Diversidad de la herpetofauna de Tobar Donoso, prov. Carchi, Ecuador. Museo Ecuatoriano de Ciencias Naturales, Quito, 34 pp.
